# Supplementary material for: Synthesis methods to prepare single- and multi-core iron oxide nanoparticles for biomedical applications
Source: Royal Society of Chemistry journal article supplement (doi:10.1039/c4dt03013c), 2014-12-22
Supplement: c4dt03013c1.pdf [file c4dt03013c1.pdf]

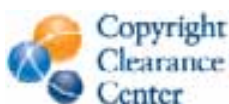

RightsLink®

Home

Account Info

Help

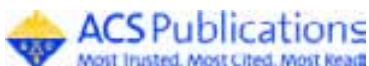

**Title:** Magnetic Capsules for NMR Imaging: Effect of Magnetic Nanoparticles Spatial Distribution and Aggregation

**Author:** Azhar Zahoor Abbasi, Lucía Gutiérrez, Loretta L. del Mercato, et al

**Publication:** The Journal of Physical Chemistry C

**Publisher:** American Chemical Society

**Date:** Apr 1, 2011

Copyright © 2011, American Chemical Society

Logged in as:  
Lucia Gutierrez  
Account #:  
3000751182

LOGOUT

### PERMISSION/LICENSE IS GRANTED FOR YOUR ORDER AT NO CHARGE

This type of permission/license, instead of the standard Terms & Conditions, is sent to you because no fee is being charged for your order. Please note the following:

- Permission is granted for your request in both print and electronic formats, and translations.
- If figures and/or tables were requested, they may be adapted or used in part.
- Please print this page for your records and send a copy of it to your publisher/graduate school.
- Appropriate credit for the requested material should be given as follows: "Reprinted (adapted) with permission from (COMPLETE REFERENCE CITATION). Copyright (YEAR) American Chemical Society." Insert appropriate information in place of the capitalized words.
- One-time permission is granted only for the use specified in your request. No additional uses are granted (such as derivative works or other editions). For any other uses, please submit a new request.

If credit is given to another source for the material you requested, permission must be obtained from that source.

BACK

CLOSE WINDOW
